# Supplementary material for: Synthesis and applications of [60]fullerene nanoconjugate with 5-aminolevulinic acid and its glycoconjugate as drug delivery vehicles
Source: Royal Society of Chemistry journal article supplement (doi:10.1039/d1ra08499b), 2022-01-01
Supplement: d1ra08499b1.pdf [file d1ra08499b1.pdf]

**SYNTHESIS AND APPLICATIONS OF [60]FULLERENE NANOCONJUGATE  
WITH 5-AMINOLEVULINIC ACID AND ITS GLYCOCONJUGATE AS DRUG  
DELIVERY VEHICLES**

Maciej Serda,<sup>a</sup> Robert Gawecki,<sup>b,c</sup> Mateusz Dulski,<sup>d</sup> Mieczysław Sajewicz,<sup>a</sup> Ewa Talik,<sup>c</sup>  
Magdalena Szubka,<sup>c</sup> Maciej Zubko,<sup>d,e</sup> Katarzyna Malarz,<sup>b,c</sup> Anna Mrozek-Wilczkiewicz,<sup>b,c</sup>  
Robert Musioł<sup>a</sup>

<sup>a</sup>*Institute of Chemistry, University of Silesia in Katowice, Szkolna 9, 40-006 Katowice, Poland*

<sup>b</sup>*Silesian Center for Education and Interdisciplinary Research, 75 Pulku Piechoty 1a, 41-500 Chorzow, Poland*

<sup>c</sup>*A. Chelkowski Institute of Physics, University of Silesia, 75 Pulku Piechoty 1, 41-500 Chorzow, Poland*

<sup>d</sup>*Institute of Materials Science, University of Silesia in Katowice, 75 Pulku Piechoty, 1A, 41-500, Chorzow, Poland*

<sup>e</sup>*Department of Physics, Faculty of Science, University of Hradec Králové, Rokytanského 62, 500 03 Hradec  
Králové, Czech Republic*

Correspondence: Dr. Maciej Serda, Institute of Chemistry, University of Silesia in Katowice,  
Szkolna 9, 40-006 Katowice, Poland. Tel: +48323591545; Fax: +48322599978, email:  
maciej.serda@us.edu.pl

**ELEMENTAL ANALYSIS OF C<sub>60</sub>-ALA**

**REACTION SCHEME FOR SYNTHESIS OF C<sub>60</sub>-ALA and C<sub>60</sub>-ALA-GA**

**<sup>13</sup>C-NMR of C<sub>60</sub>-ALA**

**ESI-MS SPECTRUM OF C<sub>60</sub>-ALA**

**UV-VIS SPECTRUM OF C<sub>60</sub>-ALA-GA**

**DLS AND ZETA POTENTIALS OF C<sub>60</sub>-ALA and C<sub>60</sub>-ALA-GA**

**HPLC MEASUREMENTS OF PpIX IN MCF-7 CANCER CELL LINE**

**FLUORESCENCE SPECTRUM OF C<sub>60</sub>-ALA**

**XPS STUDIES OF C<sub>60</sub>-ALA-GA**

**SEQUENCES OF PRIMERS USED FOR RT-PCR**

| Element | Concentration |
|---------|---------------|
| C       | 54.83         |
| O       | 36.1          |
| N       | 5.45          |
| H       | 3.62          |

### Table S1

Elemental analysis of fullerene C<sub>60</sub>-ALA.

**C<sub>60</sub>(NHCH<sub>2</sub>COCH<sub>2</sub>CH<sub>2</sub>COOH)<sub>x</sub>(OH)<sub>y</sub> EMPIRICAL FORMULA**

$$N/C \text{ RATIO: } \frac{14X}{720 + 60X} = \frac{5.45}{54.83} \quad X=8.90 \approx 9 \text{ UNITS OF 5-ALA ATTACHED to C}_{60}$$

**EMPIRICAL FORMULA: C<sub>105</sub>H<sub>96</sub>N<sub>9</sub>O<sub>51</sub> (M<sub>w</sub>= 2298 Da)**

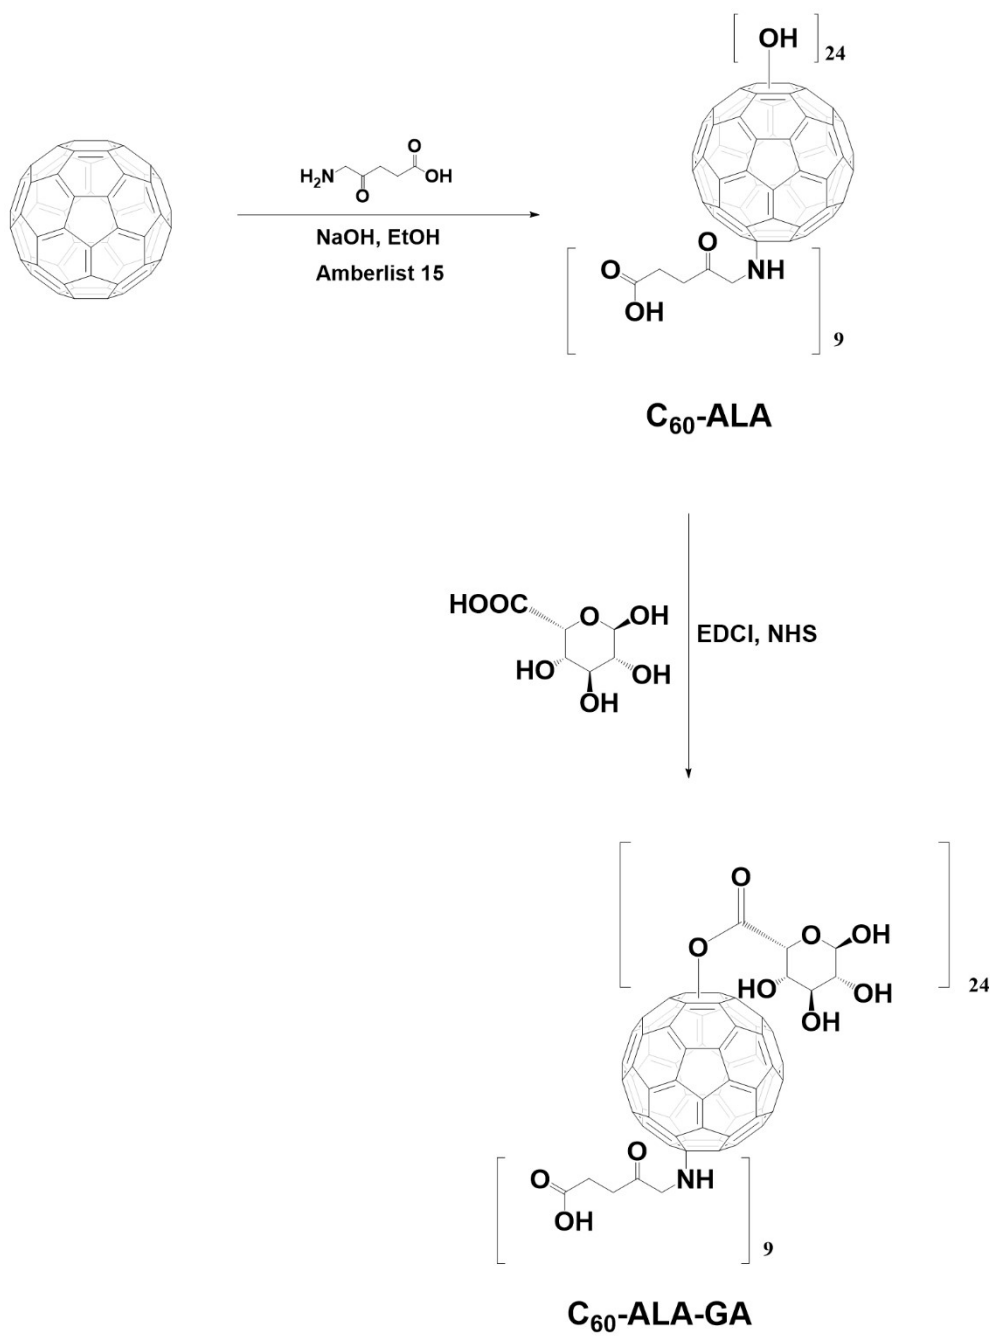

**Figure S1**

Synthetic plan for obtaining [60]fullerene nanomaterials  $\text{C}_{60}\text{-ALA}$  and  $\text{C}_{60}\text{-ALA-GA}$

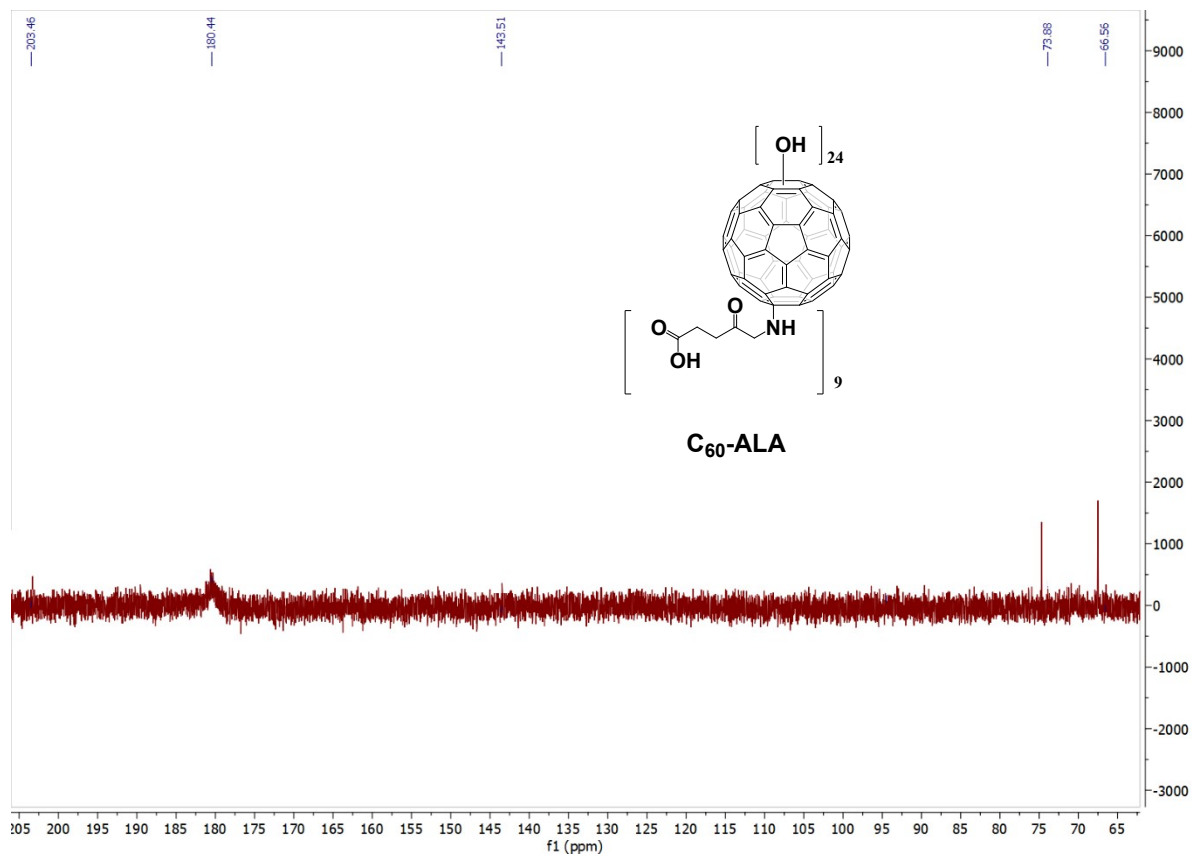

**Figure S2**

Fragment of  $^{13}\text{C}$ -NMR spectrum of fullerene nanomaterial  $\text{C}_{60}\text{-ALA}$

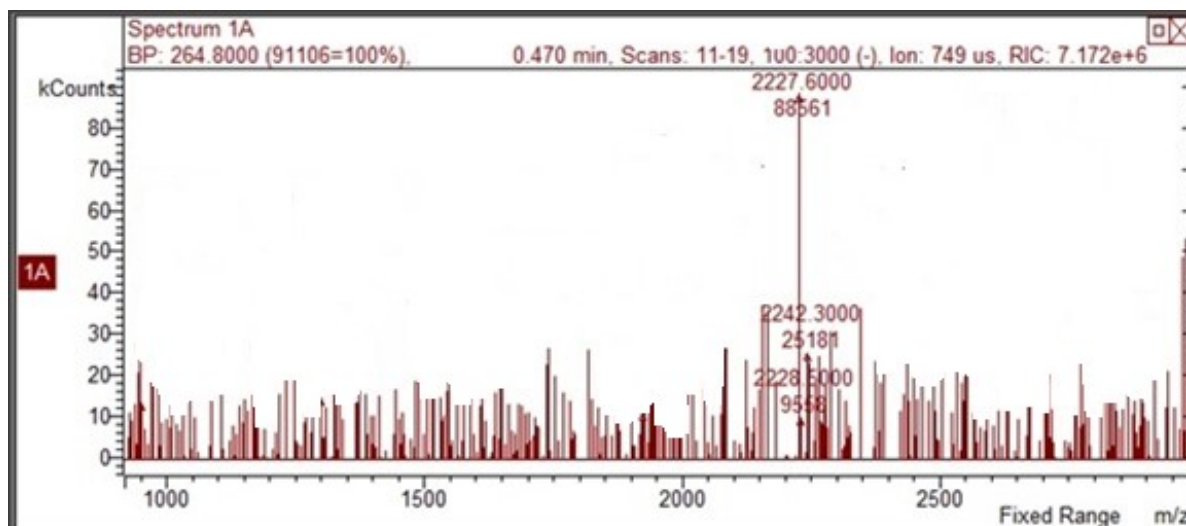

**Figure S3**

ESI-MS spectrum of fullerene nanomaterial C<sub>60</sub>-ALA in a positive mode (100 mV).

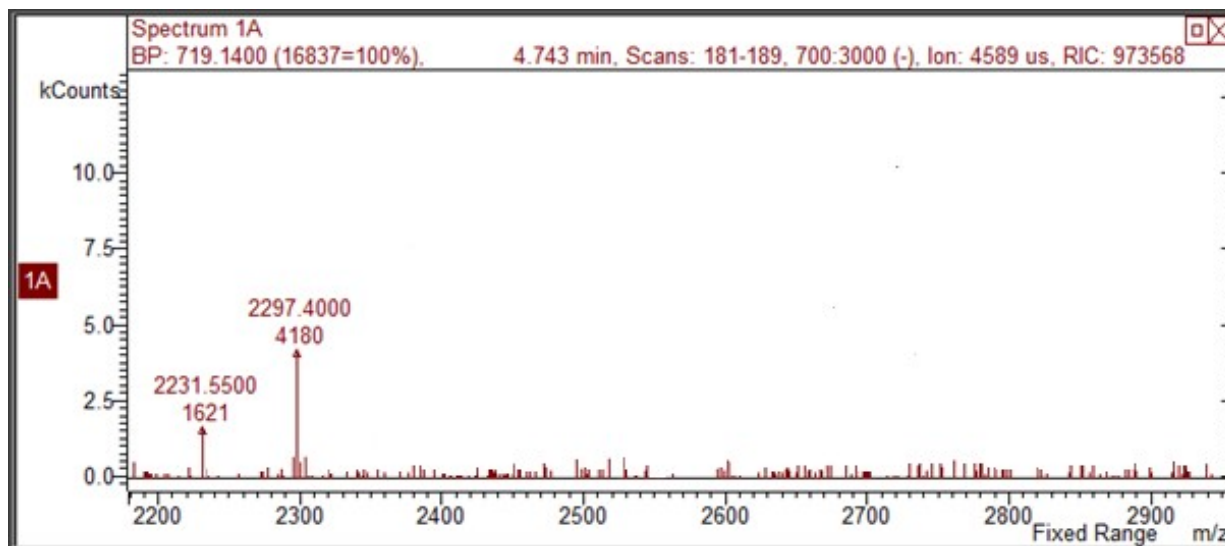

**Figure S4**

ESI-MS spectrum of fullerene nanomaterial C<sub>60</sub>-ALA in a negative mode (25 mV).

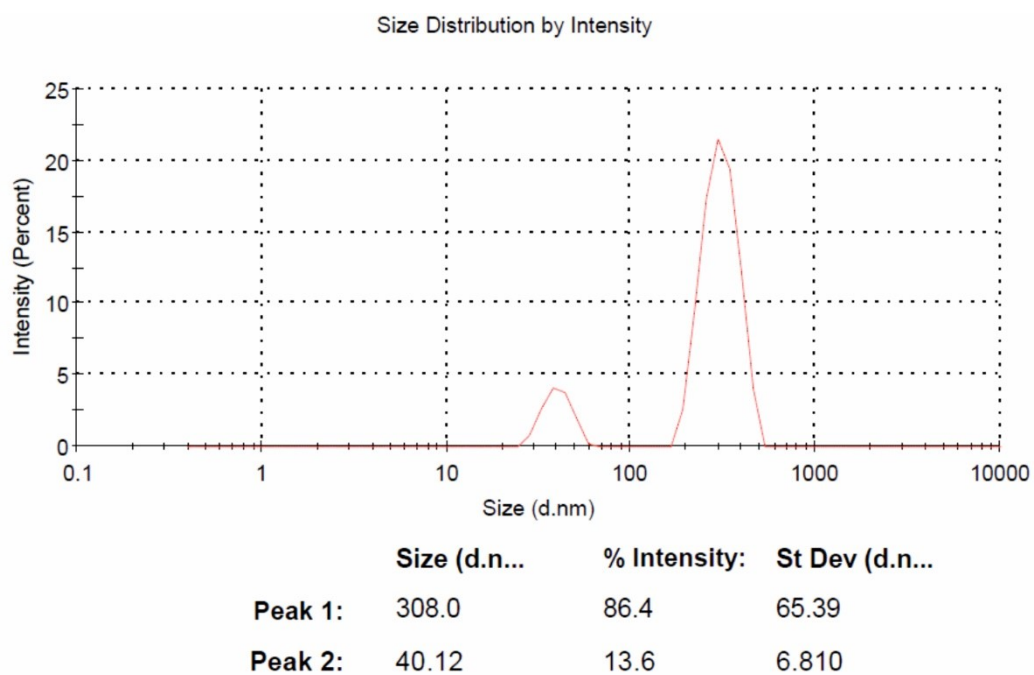

**Figure S5**

Size measurement of fullerene nanomaterial C<sub>60</sub>-ALA using dynamic light scattering technique.

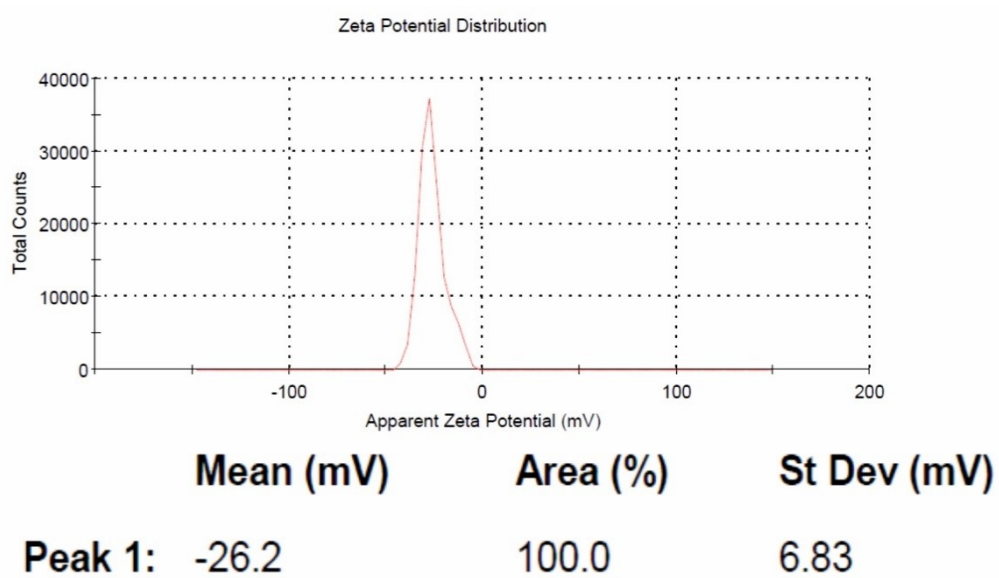

**Figure S6**

Zeta potential of fullerene nanomaterial C<sub>60</sub>-ALA.

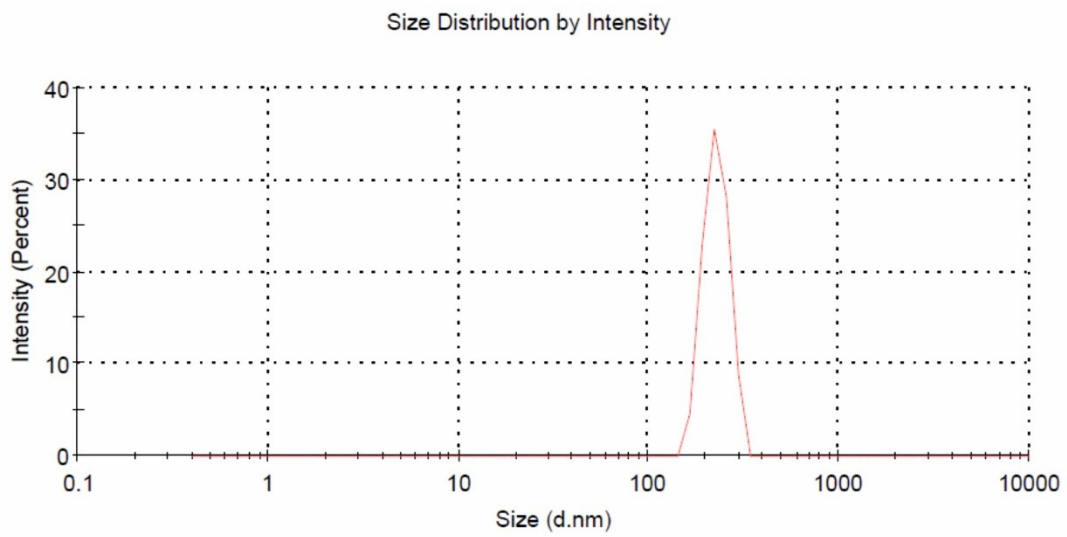

|         | Size (d.n... | % Intensity: | St Dev (d.n... |
|---------|--------------|--------------|----------------|
| Peak 1: | 227.1        | 100.0        | 33.83          |

**Figure S7**

Size measurement of fullerene nanomaterial C<sub>60</sub>-ALA-GA using the dynamic light scattering technique.



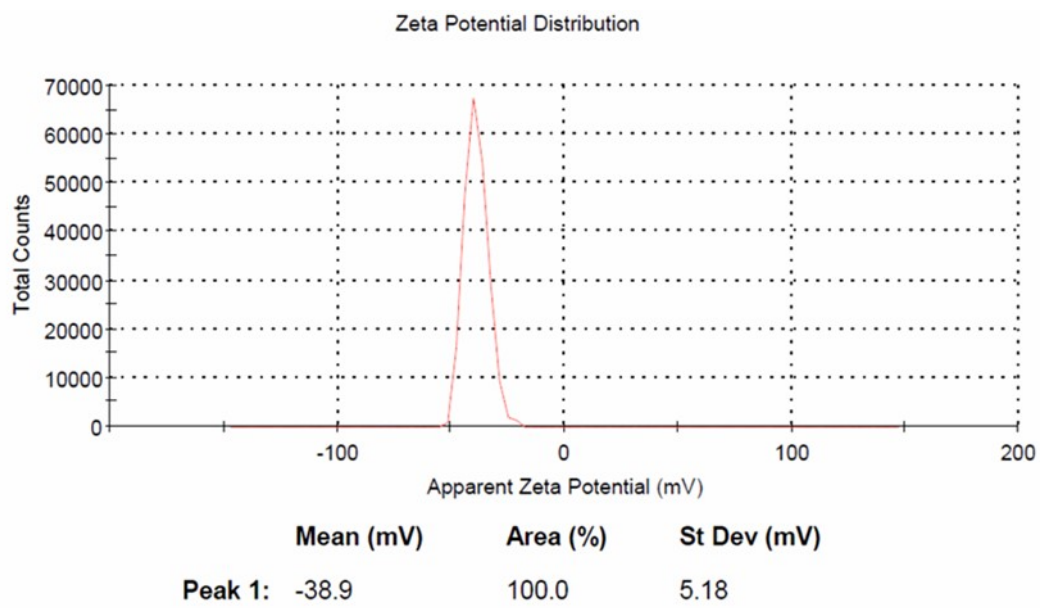

**Figure S8**

Zeta potential of fullerene nanomaterial C<sub>60</sub>-ALA-GA.

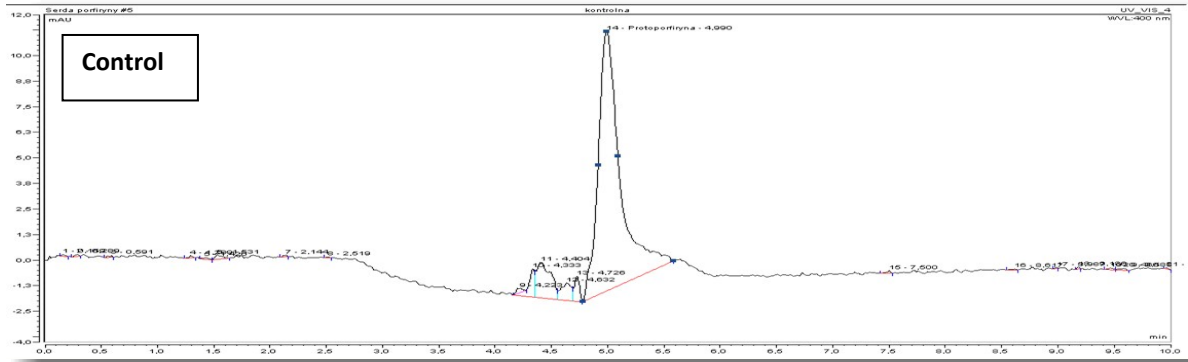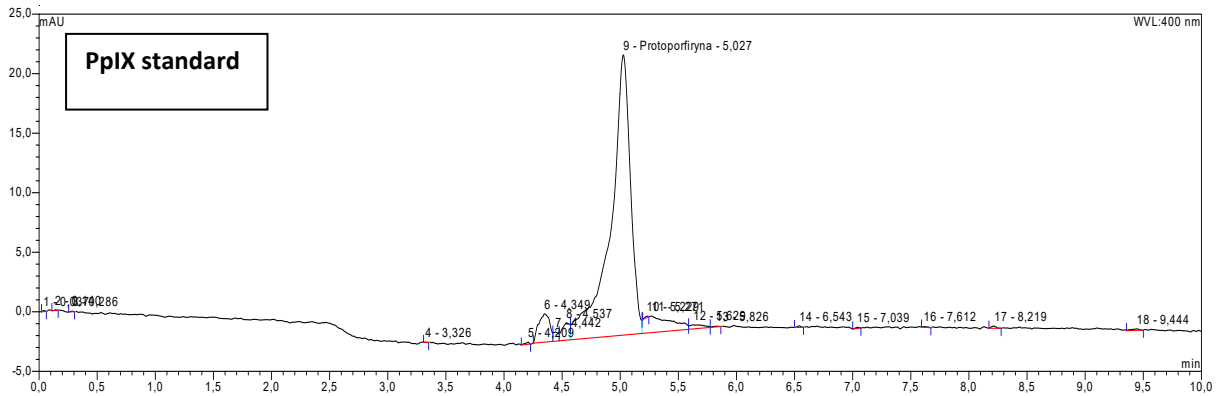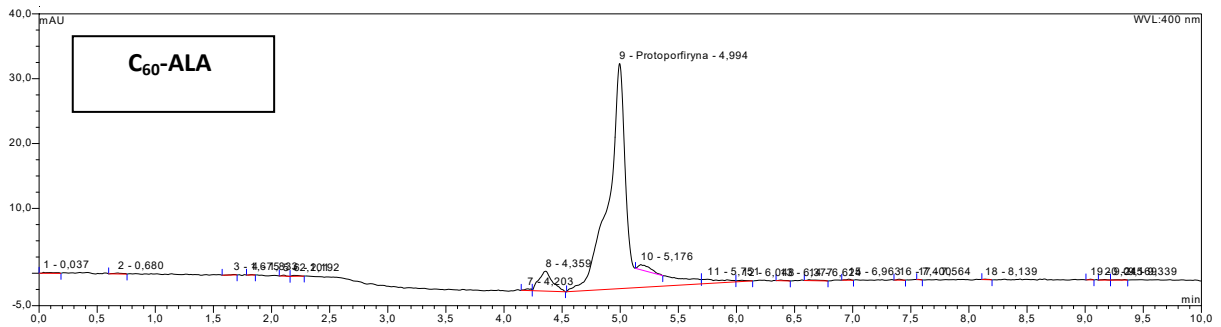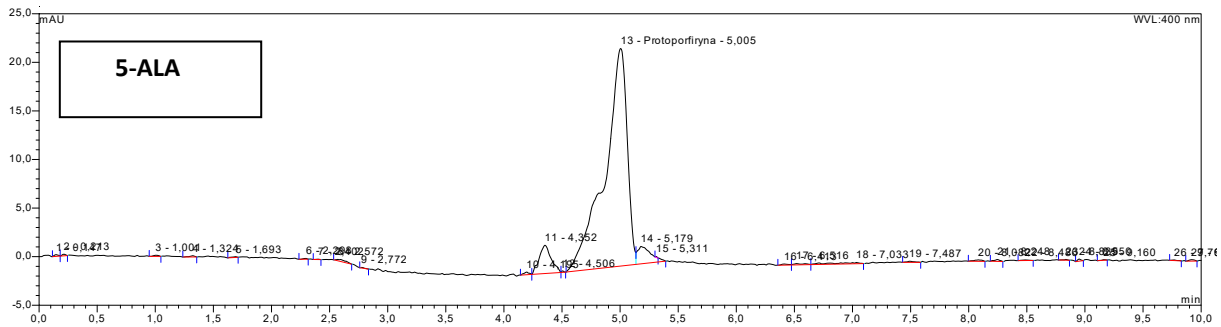

### Figure S9

The HPLC chromatograms measured for dedicated bio-extracts from MCF-7 cancer cell line and standard (PpIX, Sigma Aldrich). The cells before extraction were untreated (control) or treated with 5-ALA, or fullerene nanomaterial C<sub>60</sub>-ALA.

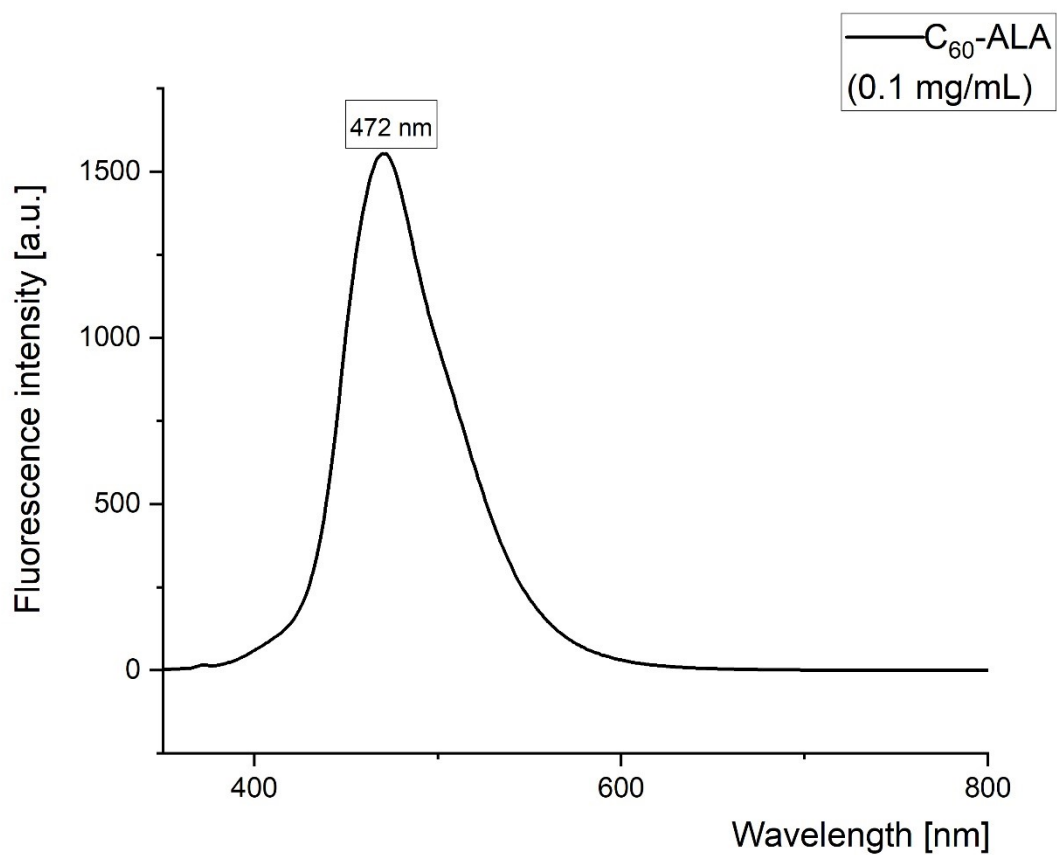

### Figure S10

Fluorescent spectrum of C<sub>60</sub>-ALA in water (c=0.1 mg/mL) excited at 340 nm.

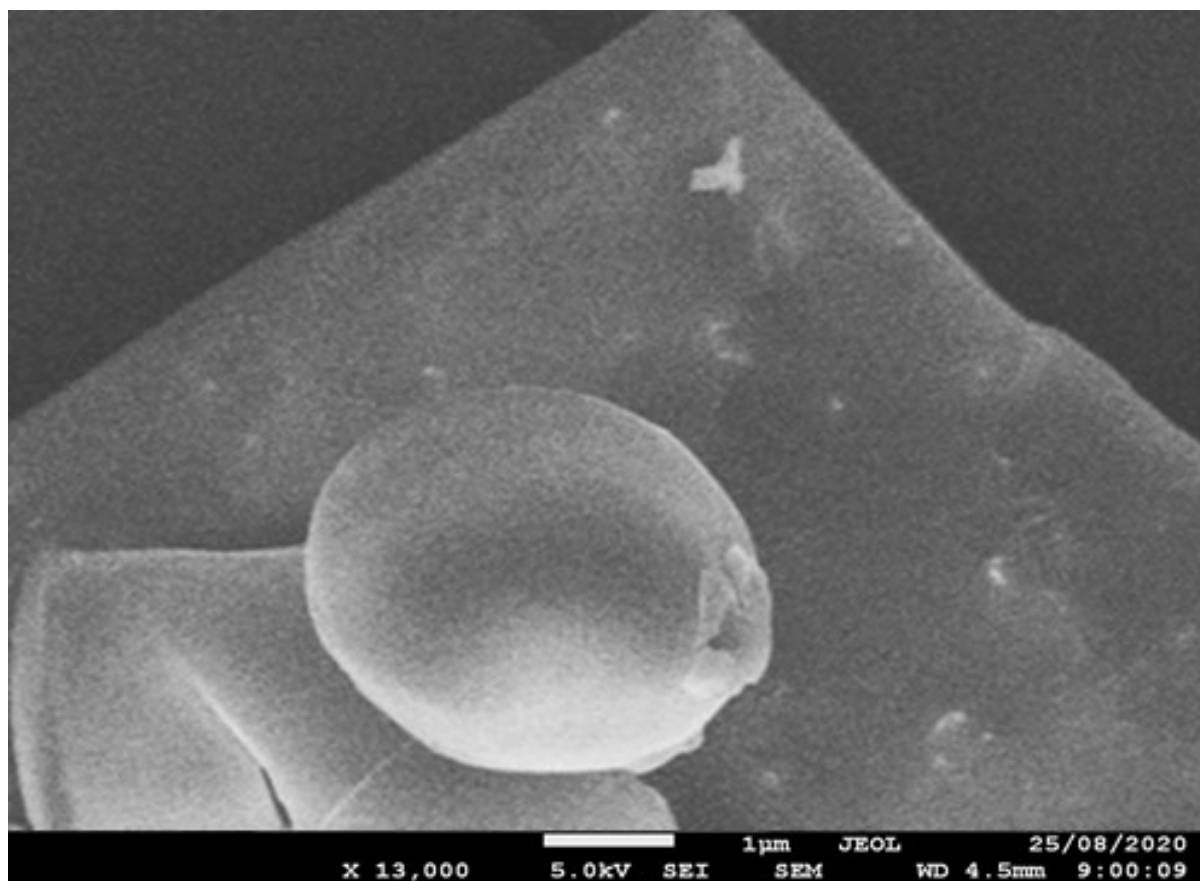

**Figure S11**

SEM image of fullerene nanomaterial C<sub>60</sub>-ALA confirming its hollow structure.

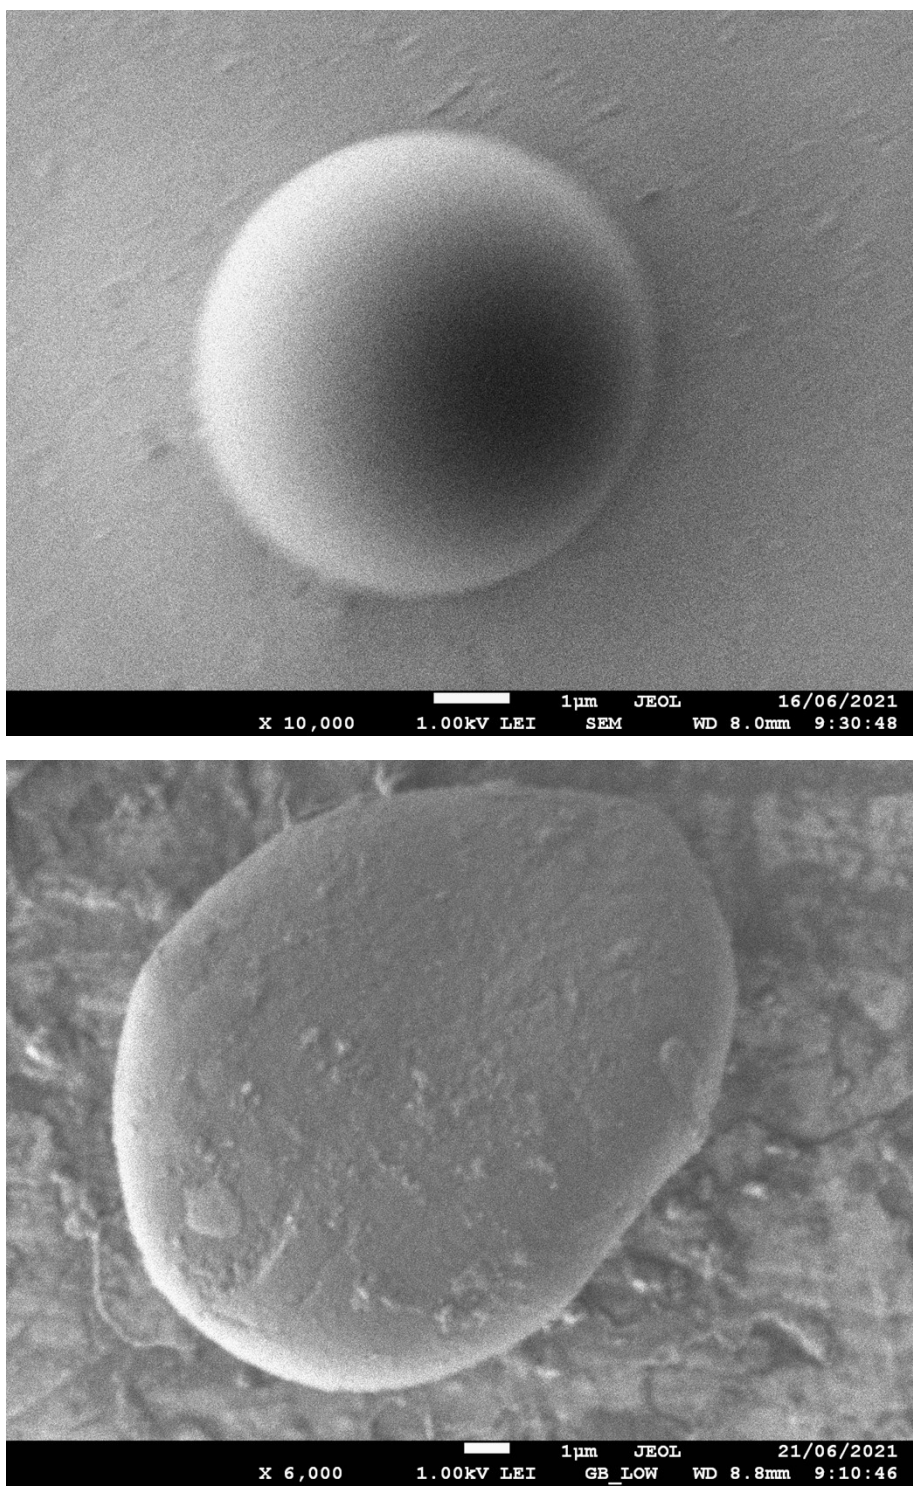

**Figure S12**

SEM images of fullerene nanomaterial C<sub>60</sub>-ALA-GA.

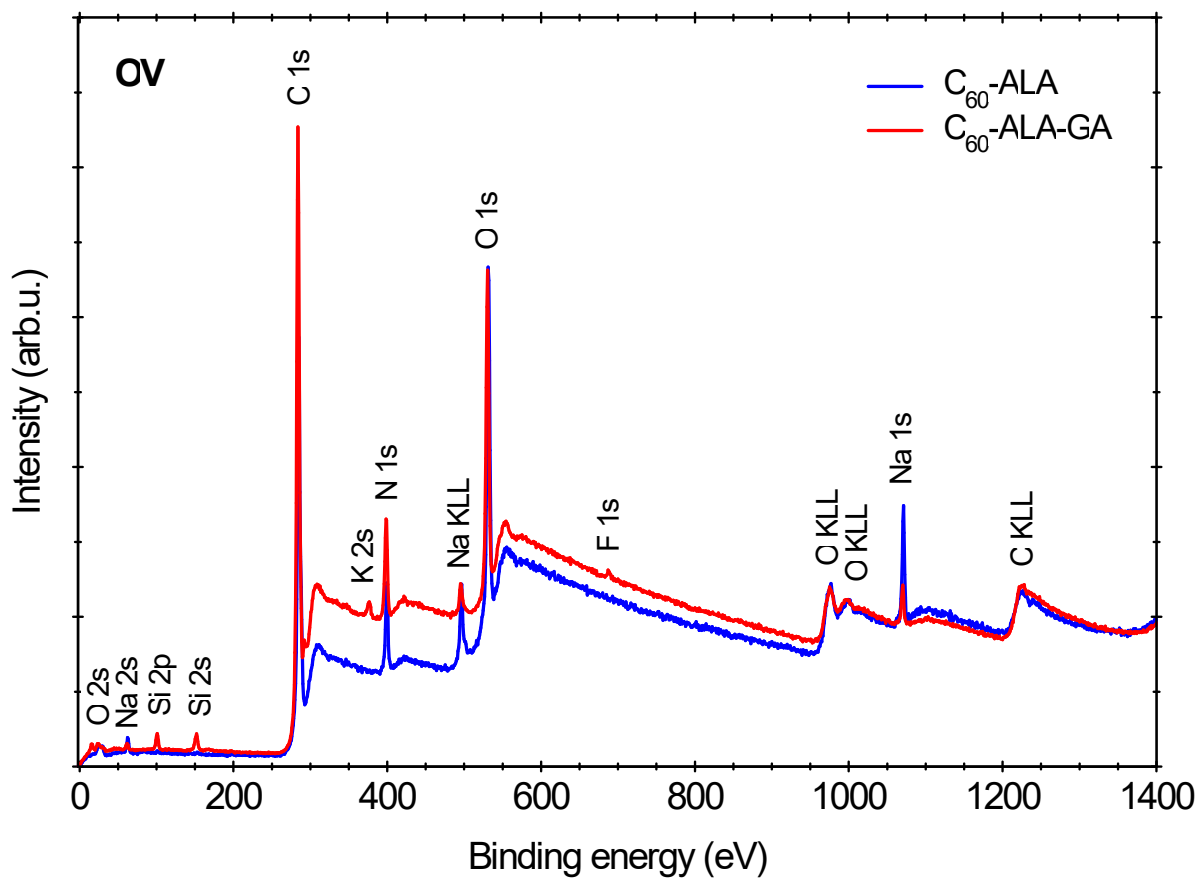

**Figure S13**

The XPS spectra of two fullerene nanomaterials in the wide energy range 0–1400 eV.

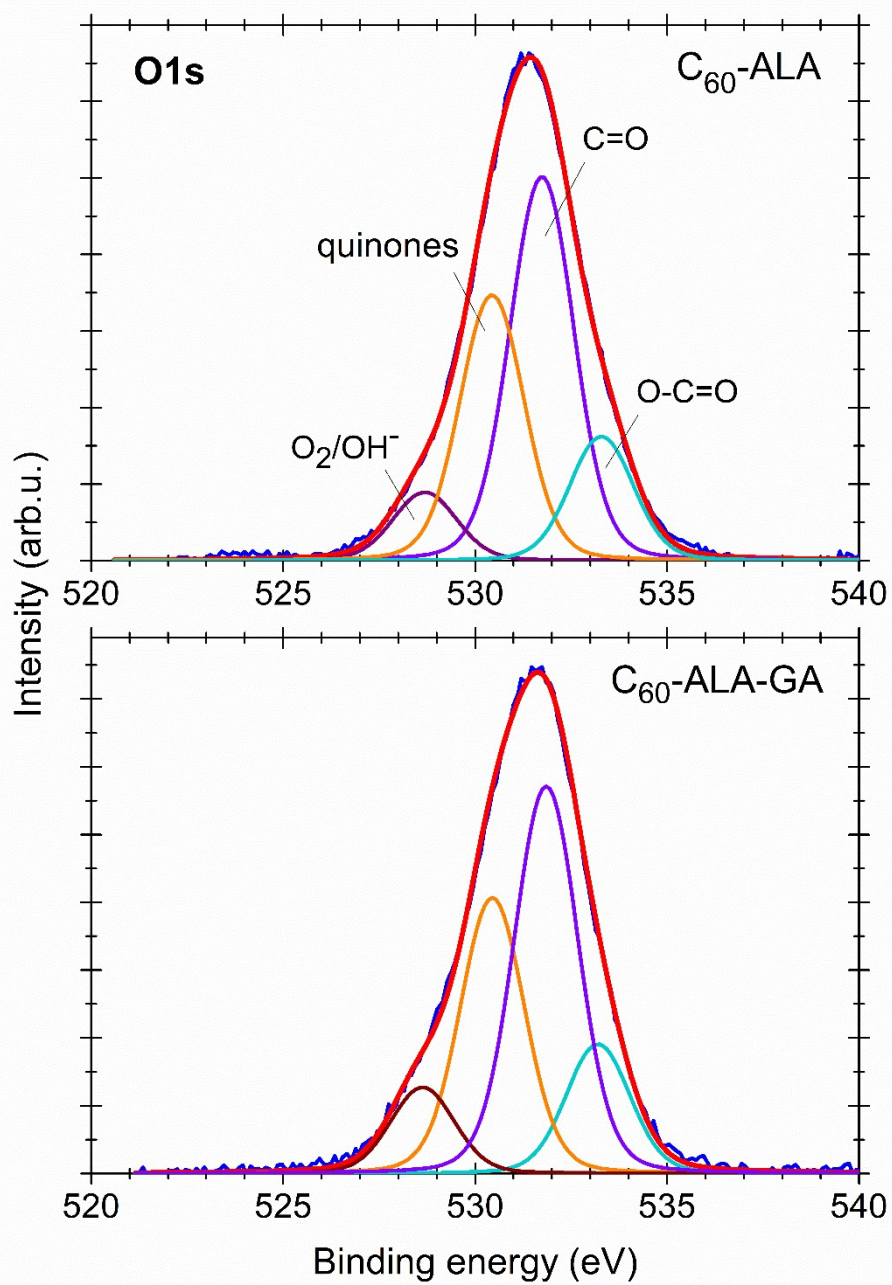

**Figure S14**

A high-resolution photoemission spectra of oxygen (O1s) measured for selected fullerene nanomaterials C<sub>60</sub>-ALA and C<sub>60</sub>-ALA-GA.

| <b>Compound</b>         | <b>C<br/>(mg/mL)</b> | <b>MCF 7<br/>(mg/mL)</b> | <b>A549<br/>(mg/mL)</b> | <b>HCT116<br/>(mg/mL)</b> |
|-------------------------|----------------------|--------------------------|-------------------------|---------------------------|
| CONTROL                 | 0                    | 0.37                     | 0.41                    | 0.78                      |
| 5-ALA                   | 1                    | 0.67                     | 0.47                    | 1                         |
| C <sub>60</sub> -ALA    | 1                    | 0.71                     | 0.66                    | 1.34                      |
| C <sub>60</sub> -ALA-GA | 1                    | 1.52                     | 1.6                     | 3.38                      |

**Table S2**

Quantitative HPLC of protoporphyrin IX detected in the cellular lysates and measured at 400 nm after the treatment of cells with 5-ALA or fullerene nanomaterials. The MCF7, A549 and HCT116 cancer cell lines were used in this study. The final results were normalized to number of substrate mmols.



|                | <b>C<sub>60</sub>-ALA</b>       |                                 |                            |                                   | <b>C<sub>60</sub>-ALA-GA</b>       |                                 |                            |                                   |
|----------------|---------------------------------|---------------------------------|----------------------------|-----------------------------------|------------------------------------|---------------------------------|----------------------------|-----------------------------------|
| <b>Element</b> | <b>Atomic concentration [%]</b> | <b>Chemical states</b>          | <b>Binding energy [eV]</b> | <b>Contributions of lines [%]</b> | <b>Atomic concentration [at %]</b> | <b>Chemical states</b>          | <b>Binding energy [eV]</b> | <b>Contributions of lines [%]</b> |
| C1s            | 64.3                            | C-Si                            | 281.53                     | 3.7                               | 69.9                               | C-Si                            | 281.54                     | 3.7                               |
|                |                                 | C=C                             | 283.23                     | 17.7                              |                                    | C=C                             | 283.21                     | 17.8                              |
|                |                                 | C-H, C-C                        | 284.89                     | 55.4                              |                                    | C-H, C-C                        | 284.90                     | 51.1                              |
|                |                                 | C-O, C-N, -C-OH                 | 286.41                     | 11.4                              |                                    | C-O, C-N, -C-OH                 | 286.36                     | 17.7                              |
|                |                                 | O=C-OH, C=O                     | 288.27                     | 11.8                              |                                    | O=C-OH, C=O                     | 288.28                     | 9.8                               |
| O1s            | 24.0                            | O <sub>2</sub> /OH <sup>-</sup> | 528.69                     | 8.1                               | 17.7                               | O <sub>2</sub> /OH <sup>-</sup> | 528.68                     | 10.5                              |
|                |                                 | quinones                        | 530.46                     | 31.5                              |                                    | quinones                        | 530.49                     | 32.1                              |
|                |                                 | C=O                             | 531.89                     | 45.6                              |                                    | C=O                             | 531.93                     | 44.7                              |
|                |                                 | O-C=O                           | 533.26                     | 14.8                              |                                    | O-C=O                           | 533.28                     | 12.7                              |
| N1s            | 7.8                             | C-N, N-(C=O)-                   | 398.43                     | 31.4                              | 8.1                                | C-N, N-(C=O)-                   | 398.35                     | 34.4                              |
|                |                                 | pyridinic N                     | 399.79                     | 60.9                              |                                    | pyridinic N                     | 399.76                     | 54.4                              |
| Na1s           | 3.5                             | -                               | -                          | -                                 | 1.1                                | -                               | -                          | -                                 |
| Si2p           | 0.2                             | -                               | -                          | -                                 | 1.7                                | -                               | -                          | -                                 |
| K2p            | -                               | -                               | -                          | -                                 | 1.1                                | -                               | -                          | -                                 |
| F1s            | -                               | -                               | -                          | -                                 | 0.2                                | -                               | -                          | -                                 |
| Cl2p           | 0.1                             | -                               | -                          | -                                 | 0.1                                | -                               | -                          | -                                 |

|     |     |   |   |   |     |   |   |   |
|-----|-----|---|---|---|-----|---|---|---|
| S2p | 0.1 | - | - | - | 0.1 | - | - | - |
|-----|-----|---|---|---|-----|---|---|---|

**Table S3**

Chemical composition and atomic concentrations for C<sub>60</sub>-ALA and C<sub>60</sub>-ALA-GA, determined from XPS measurements.

| <i>Gene name</i> | <i>Sequence of primer</i> |                        |
|------------------|---------------------------|------------------------|
| <b>PEPT1</b>     | F                         | AGGCAACA ACTATGTCCGGG  |
|                  | R                         | CACAGCATCGAAGATCGGGA   |
| <b>ABCG2</b>     | F                         | GCACAGGAAGTTTACGCACAG  |
|                  | R                         | AAGGGGCTAGAAGAAGGGGG   |
| <b>FECH</b>      | F                         | GATGAATTGTCCCCAACAC    |
|                  | R                         | GCTTCGTCCCACTTGATTA    |
| <b>HO-1</b>      | F                         | CATCCCCTACACACCAGCCA   |
|                  | R                         | ATGTTGGGGAAGGTGAAGAAGG |
| <b>GAPDH</b>     | F                         | GAGTCAACGGATTTGGTCGTA  |
|                  | R                         | GCCCCACTTGATTTTGGAG    |

**Table S4**

The sequences of the primers used in RT-PCR experiments.

| <b>Compound</b>         | <b>C [mg/mL]</b> | <b>C [mmol/L]</b> | <b>C<sub>max</sub> 5-ALA</b> |
|-------------------------|------------------|-------------------|------------------------------|
| C <sub>60</sub> -ALA    | 1                | 0.464             | 4.176                        |
| C <sub>60</sub> -ALA-GA | 1                | 0.157             | 1.413                        |
| 5-ALA                   | 1                | 5.97              | 5.97                         |

**Table S5**

The conversion of concentration units for selected fullerene nanomaterials.
